# Supplementary material for: Novel thiosemicarbazide–oxadiazole hybrids as unprecedented inhibitors of yeast α-glucosidase and in silico binding analysis
Source: Royal Society of Chemistry journal article supplement (doi:10.1039/c5ra28012e), 2016-01-01

Compound 1

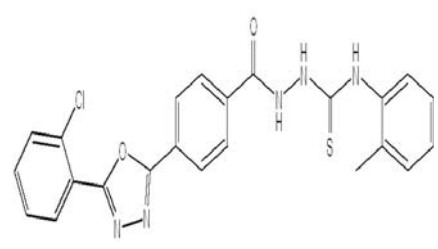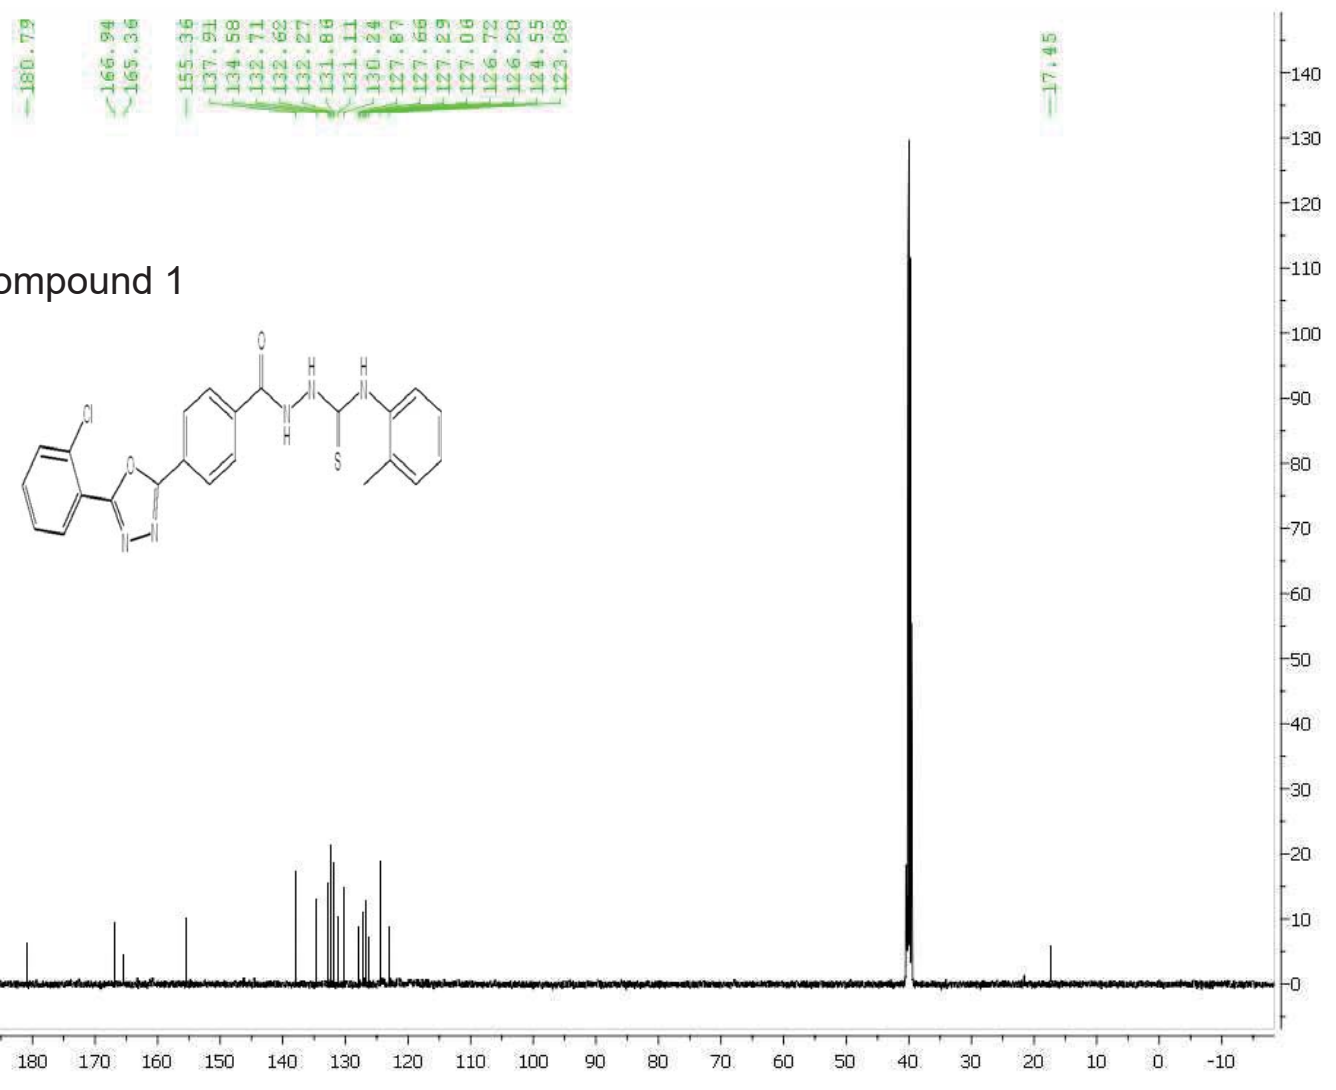

180.85  
 166.92  
 165.99  
 158.25  
 157.73  
 155.20  
 134.83  
 134.32  
 132.80  
 132.19  
 131.56  
 131.02  
 127.76  
 127.73  
 127.55  
 127.30  
 126.79  
 126.42  
 125.66  
 124.41  
 123.87  
 117.32

Compound 2

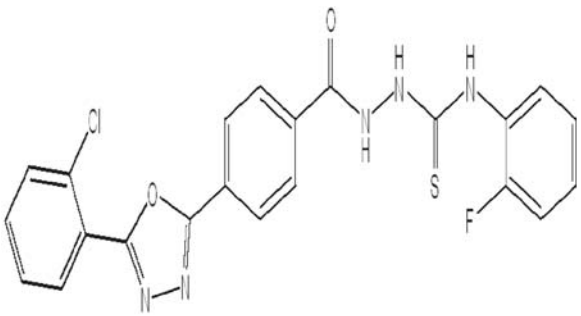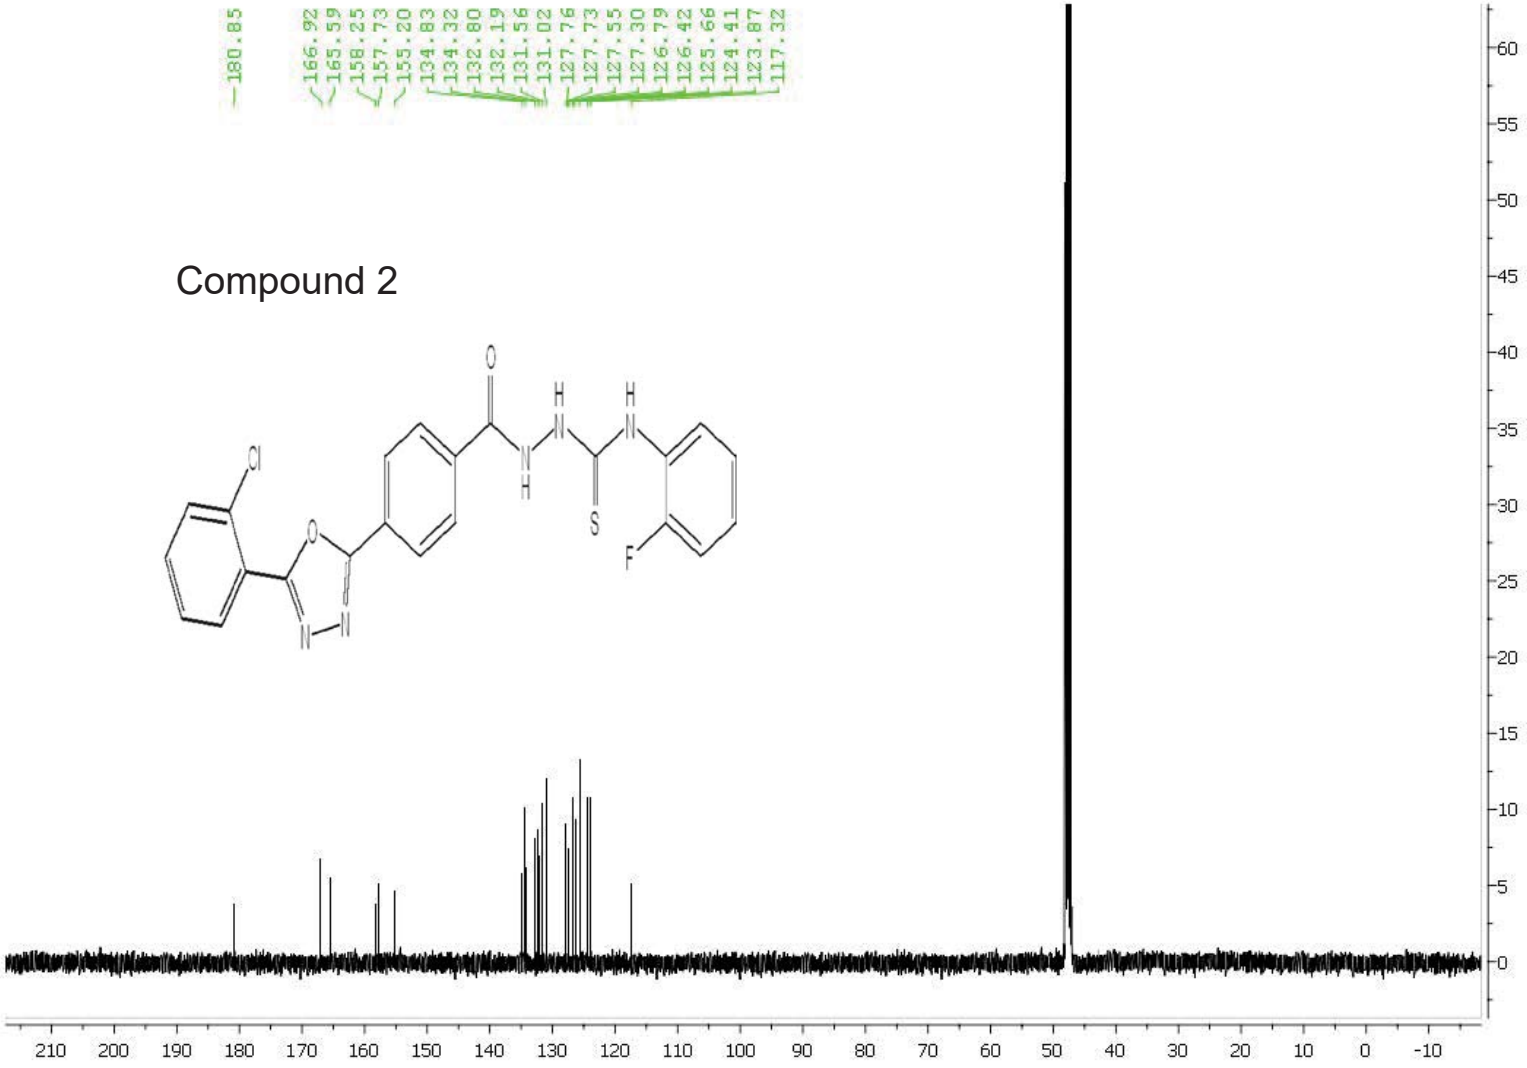

### Compound 3

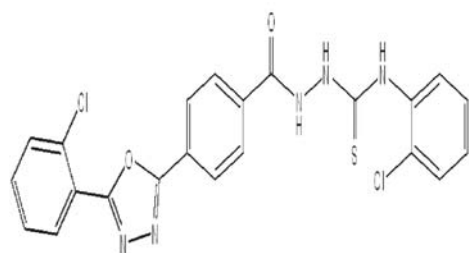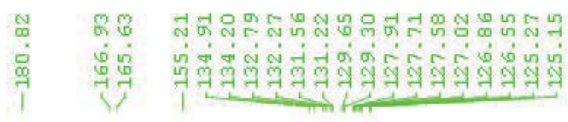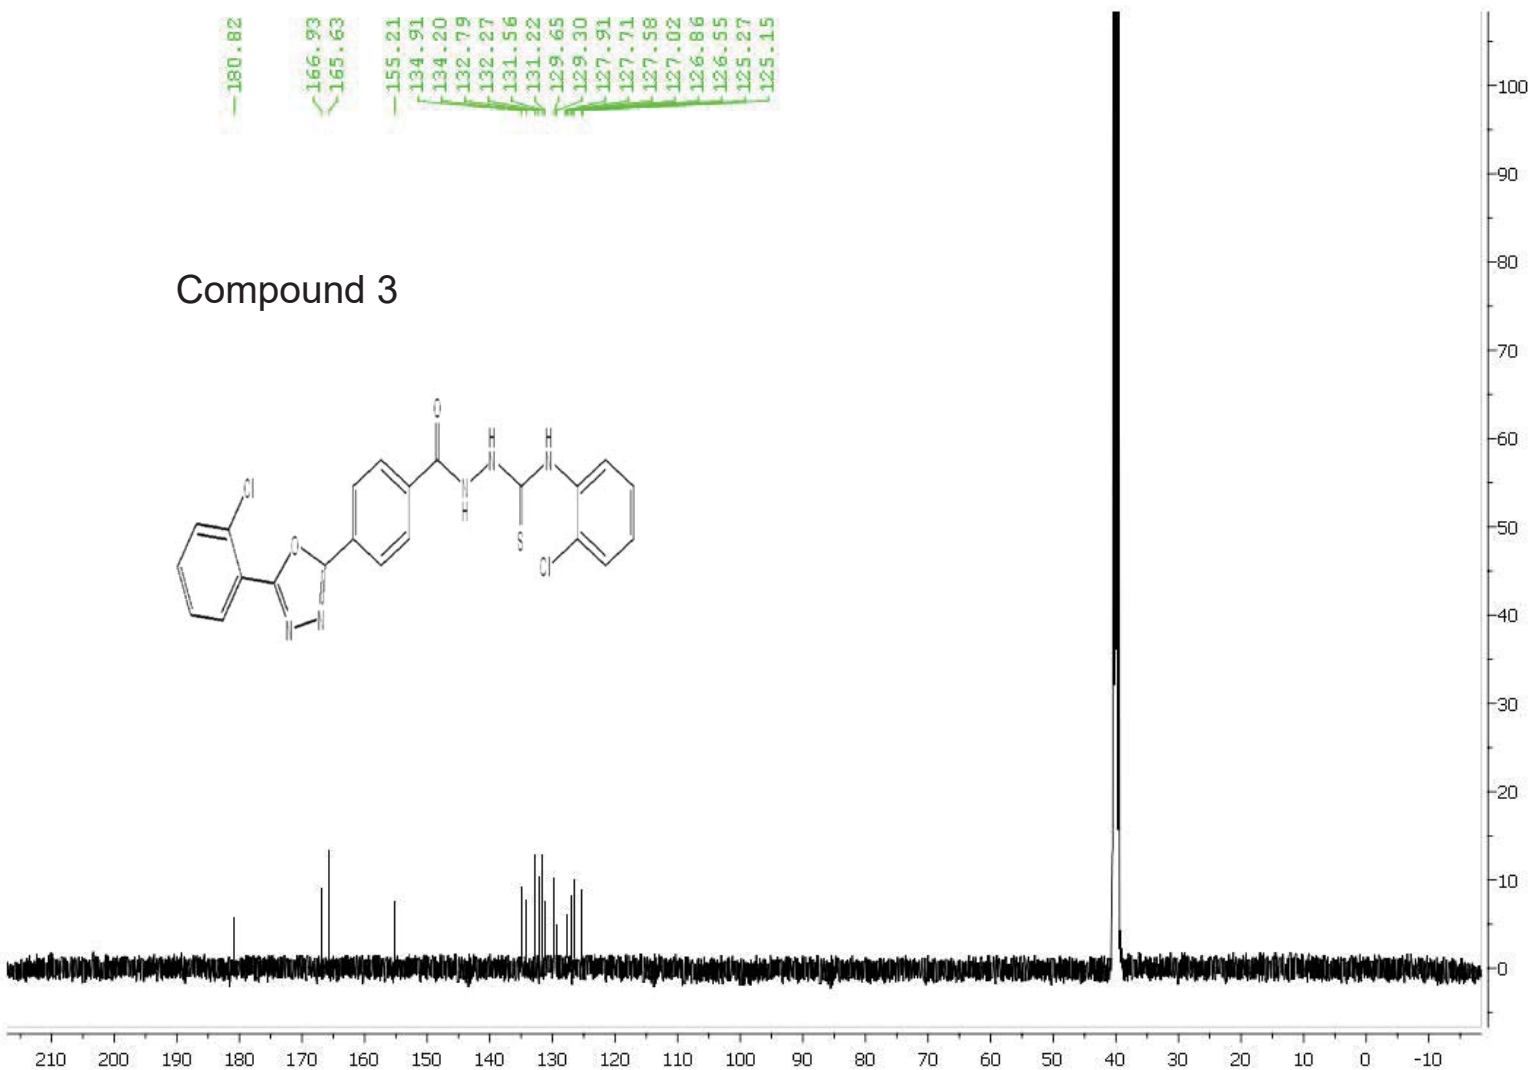

180.80  
 166.99  
 165.98  
 155.19  
 136.35  
 134.37  
 132.81  
 132.61  
 132.12  
 131.28  
 131.16  
 128.53  
 127.70  
 127.41  
 127.22  
 126.77  
 126.25  
 125.18  
 124.04  
 117.42

Compound 4

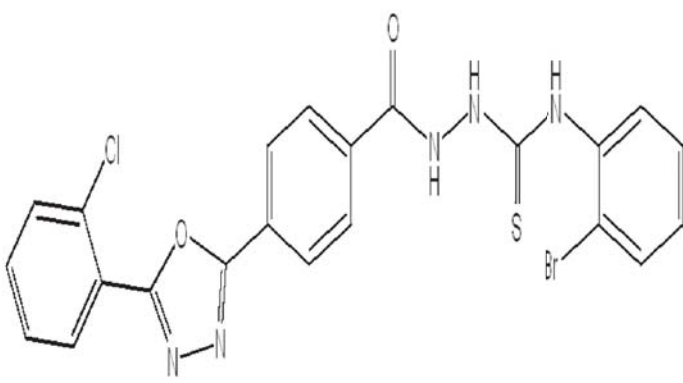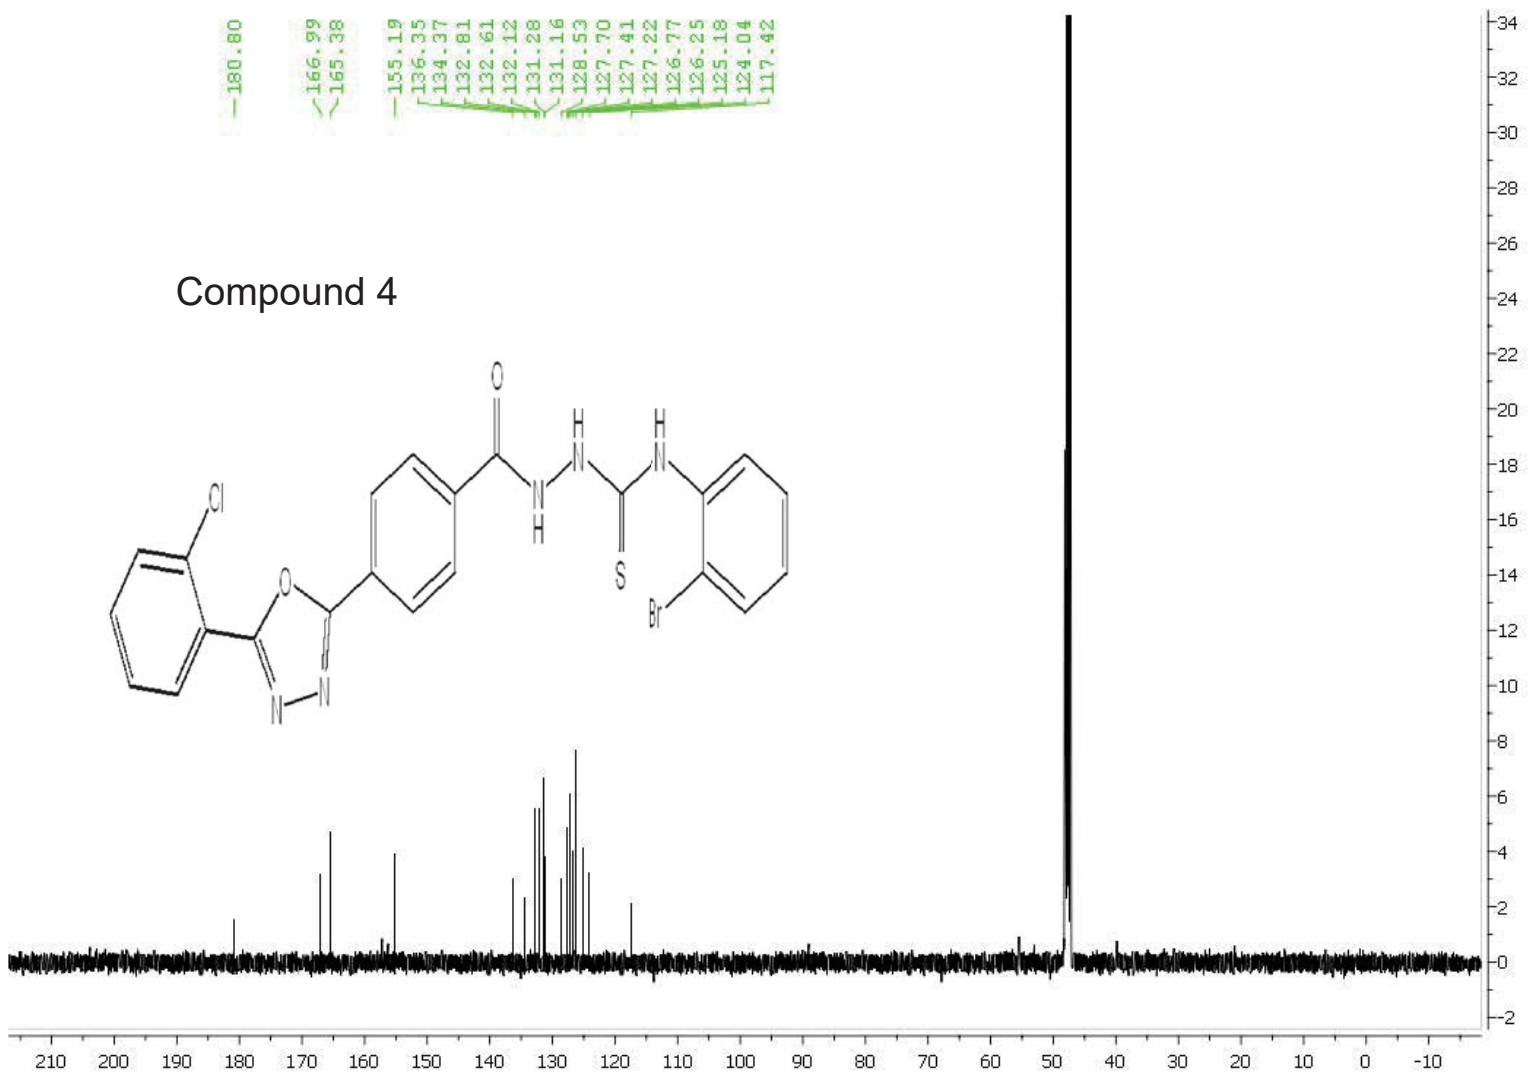

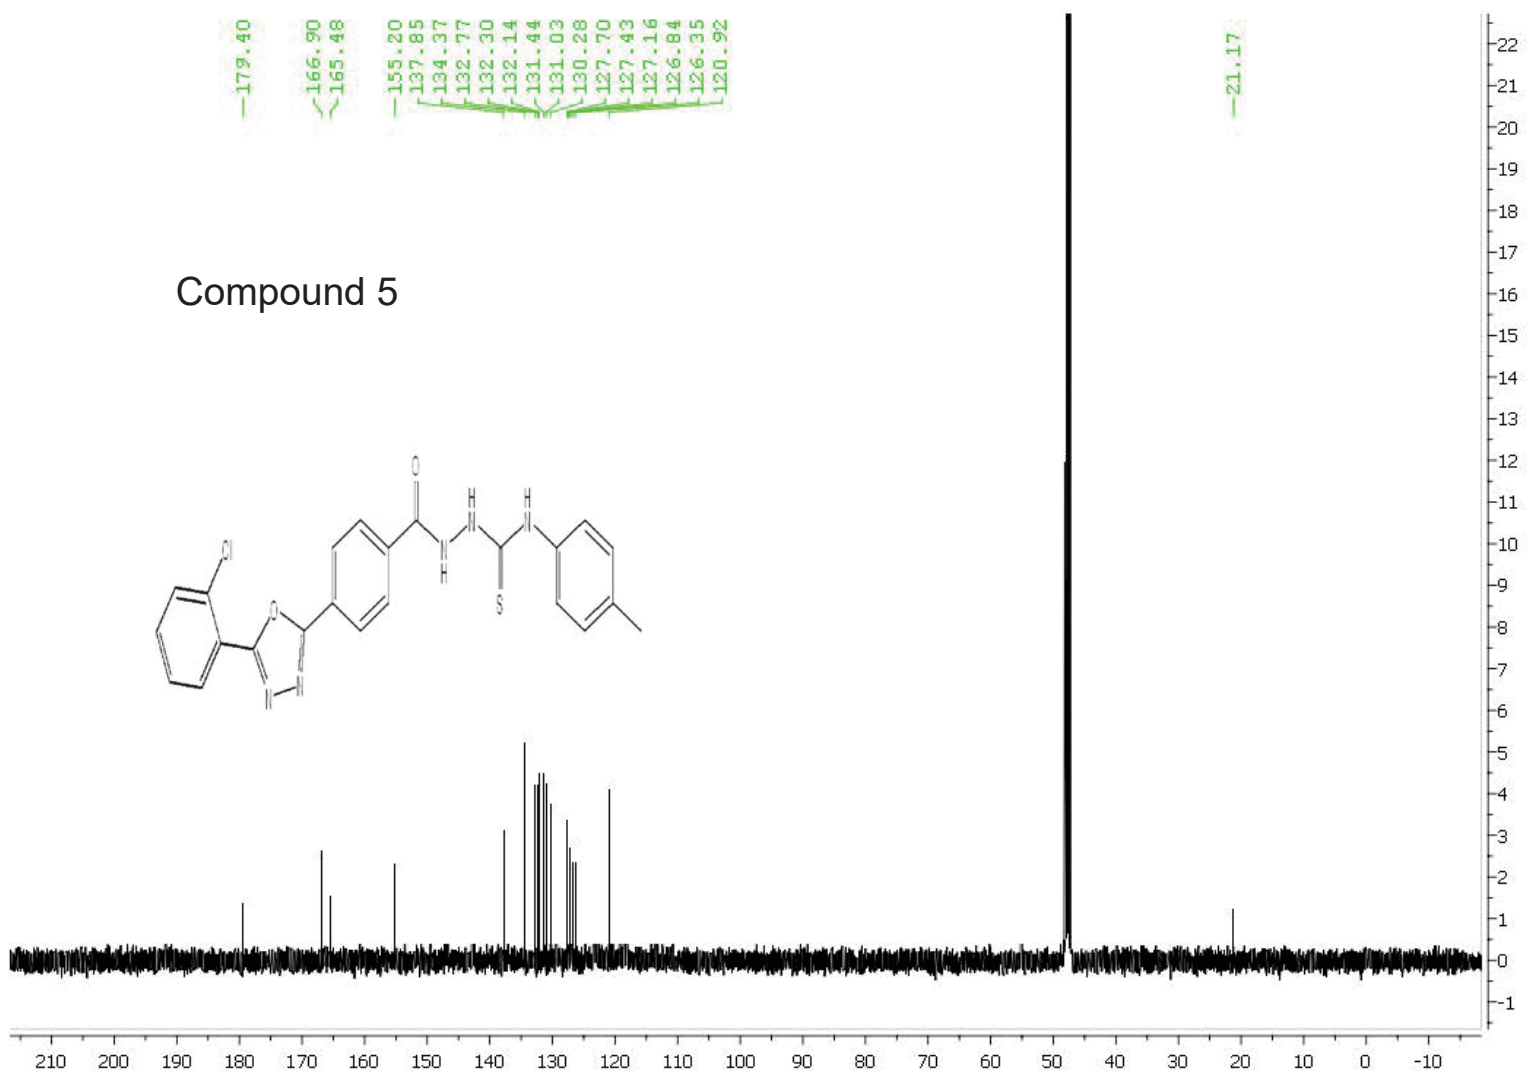

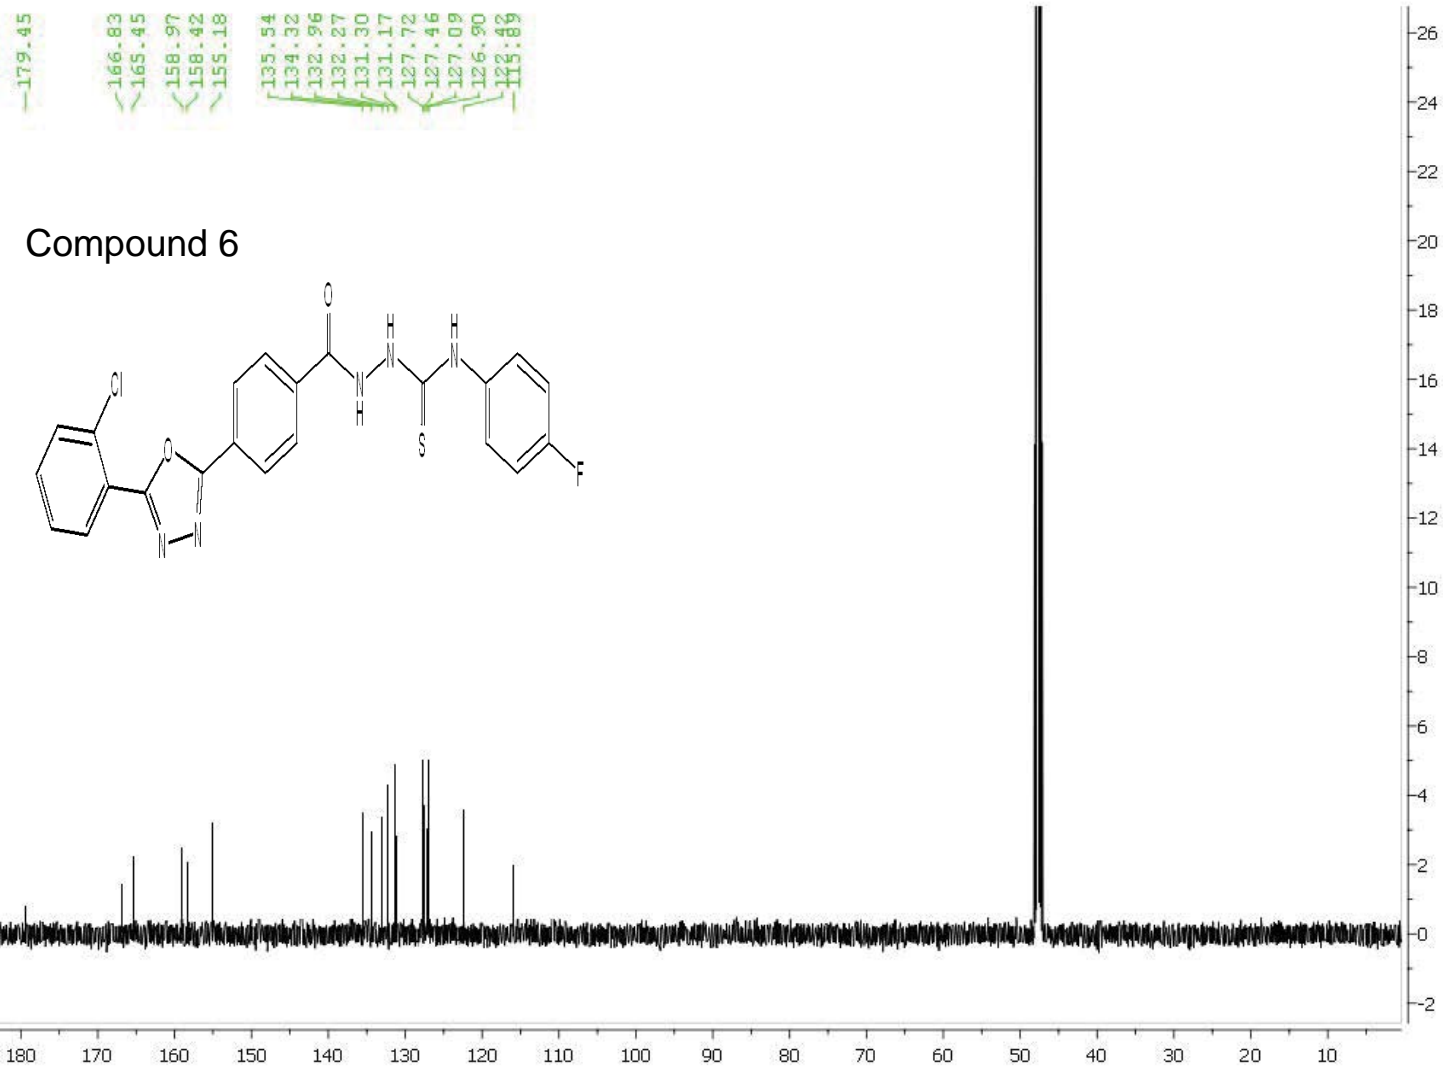

179.47  
166.94  
165.50  
155.03  
138.11  
134.43  
132.97  
131.31  
131.21  
131.12  
127.69  
127.62  
127.06  
126.88  
126.31  
123.11  
114.73

### Compound 7

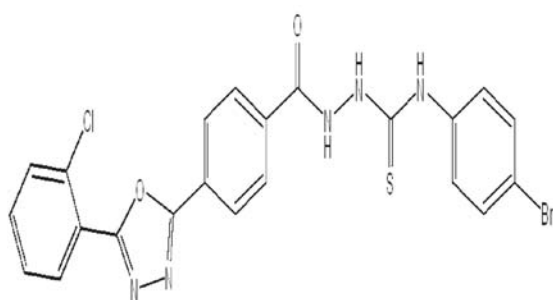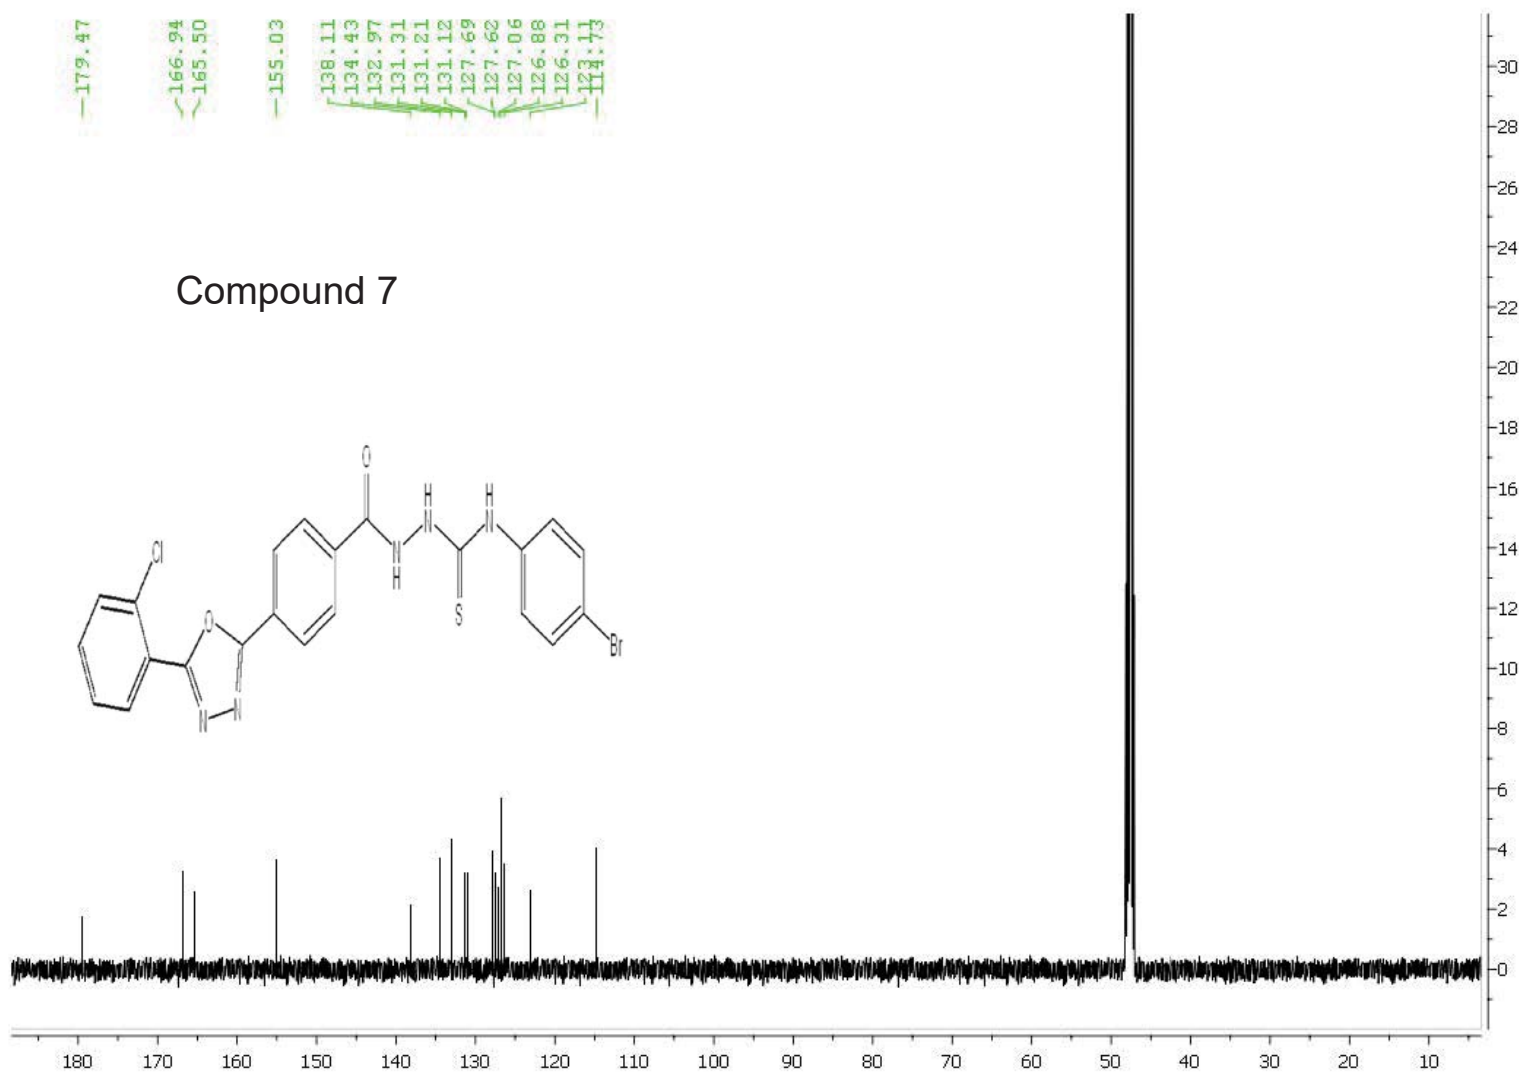

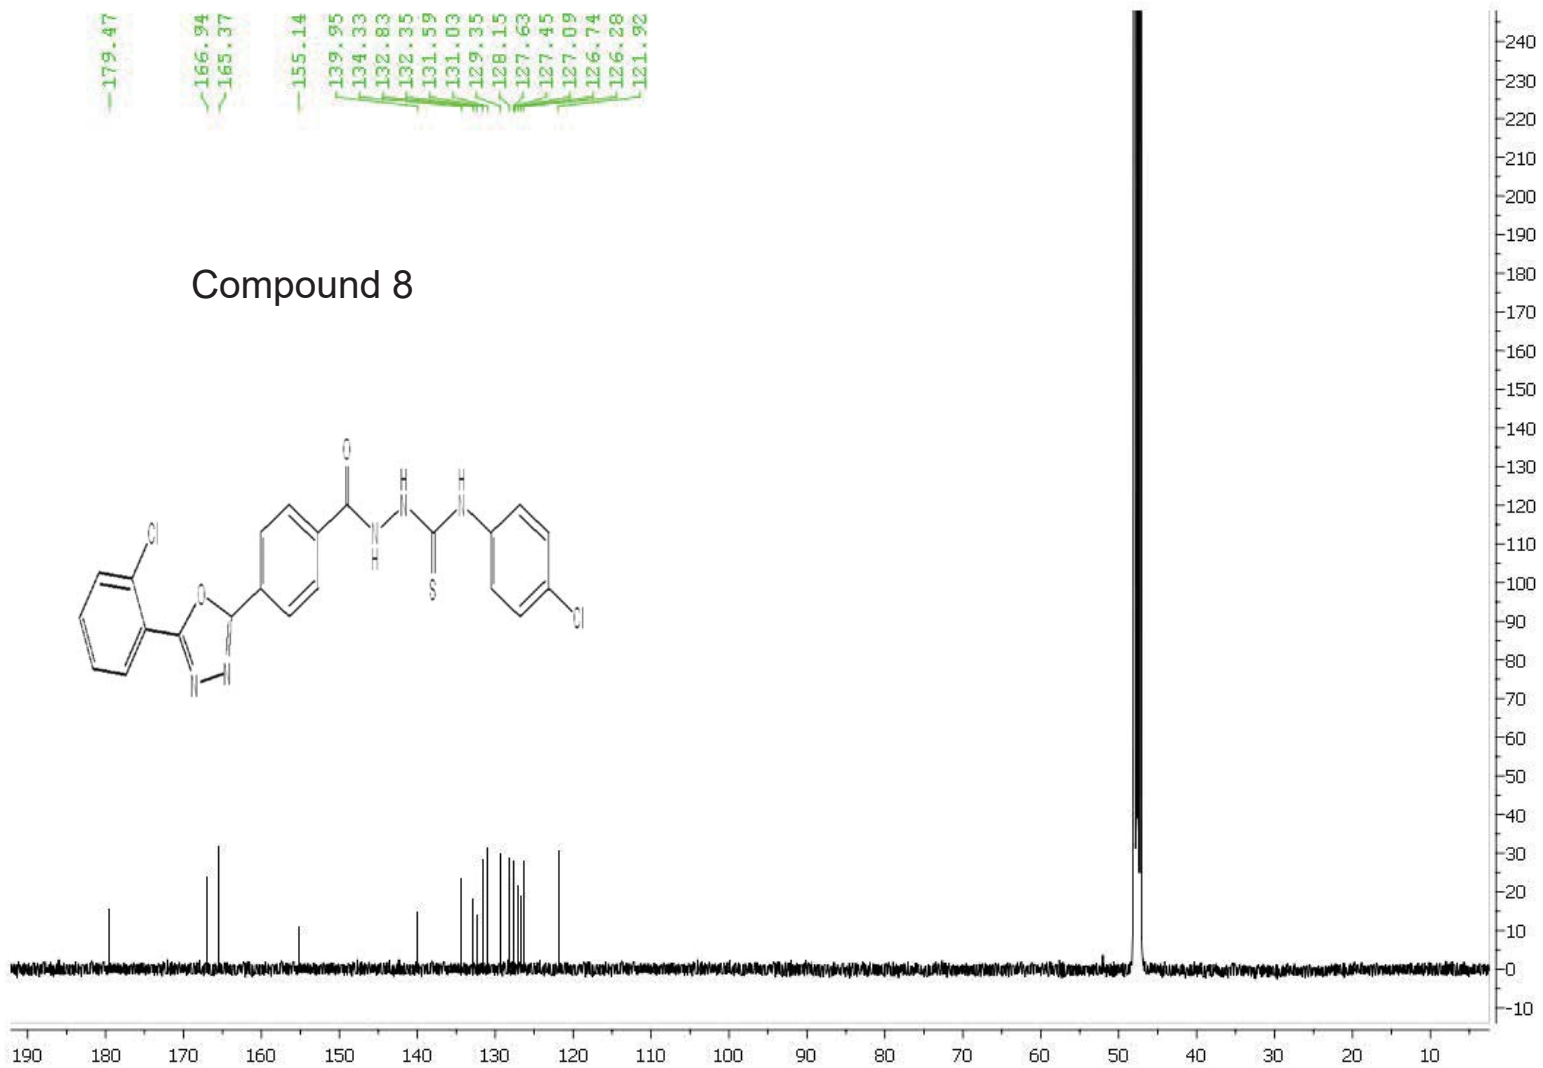



# Compound 9

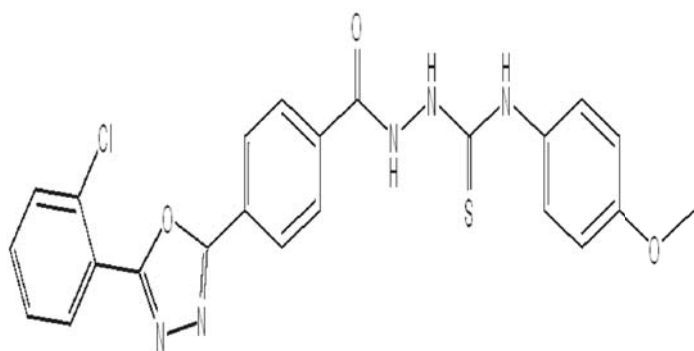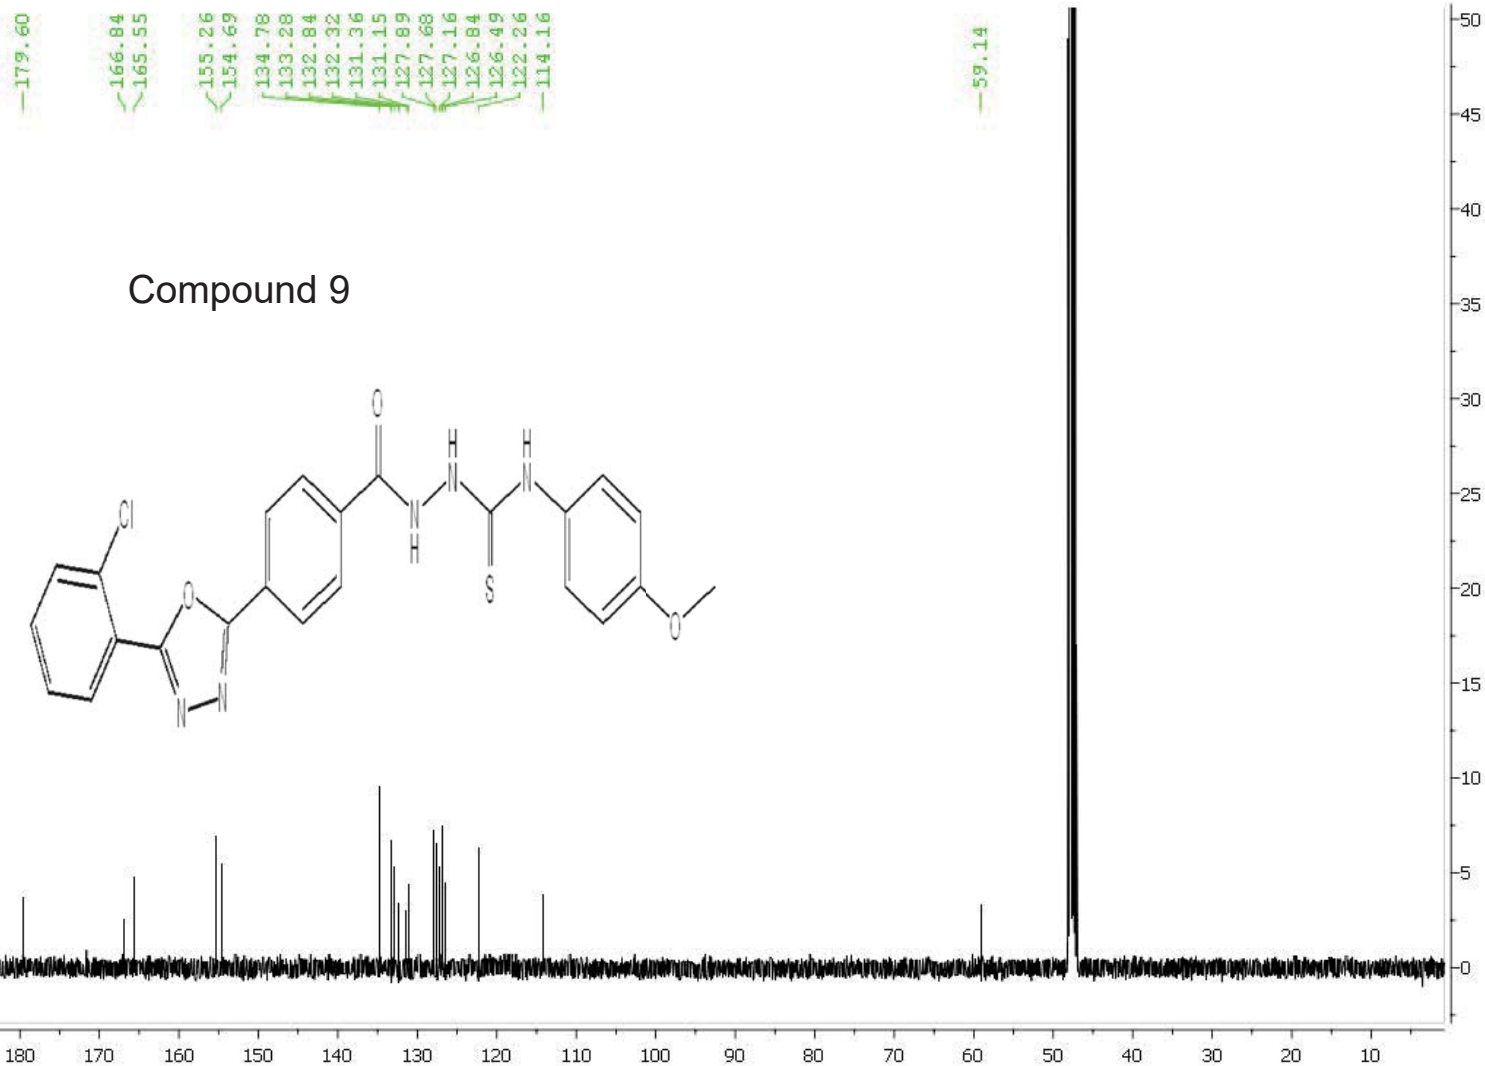

178.37  
165.80  
164.46  
156.17  
143.56  
143.14  
133.37  
132.82  
132.11  
131.47  
131.14  
127.72  
127.69  
127.15  
126.84  
126.48  
125.14  
121.05

Compound 10

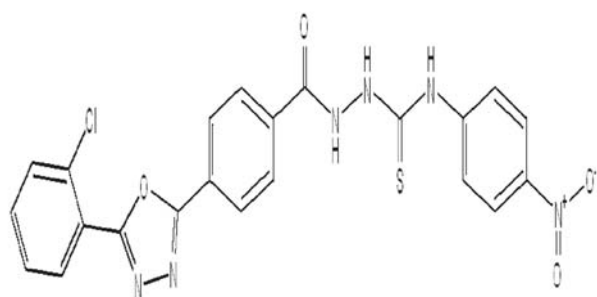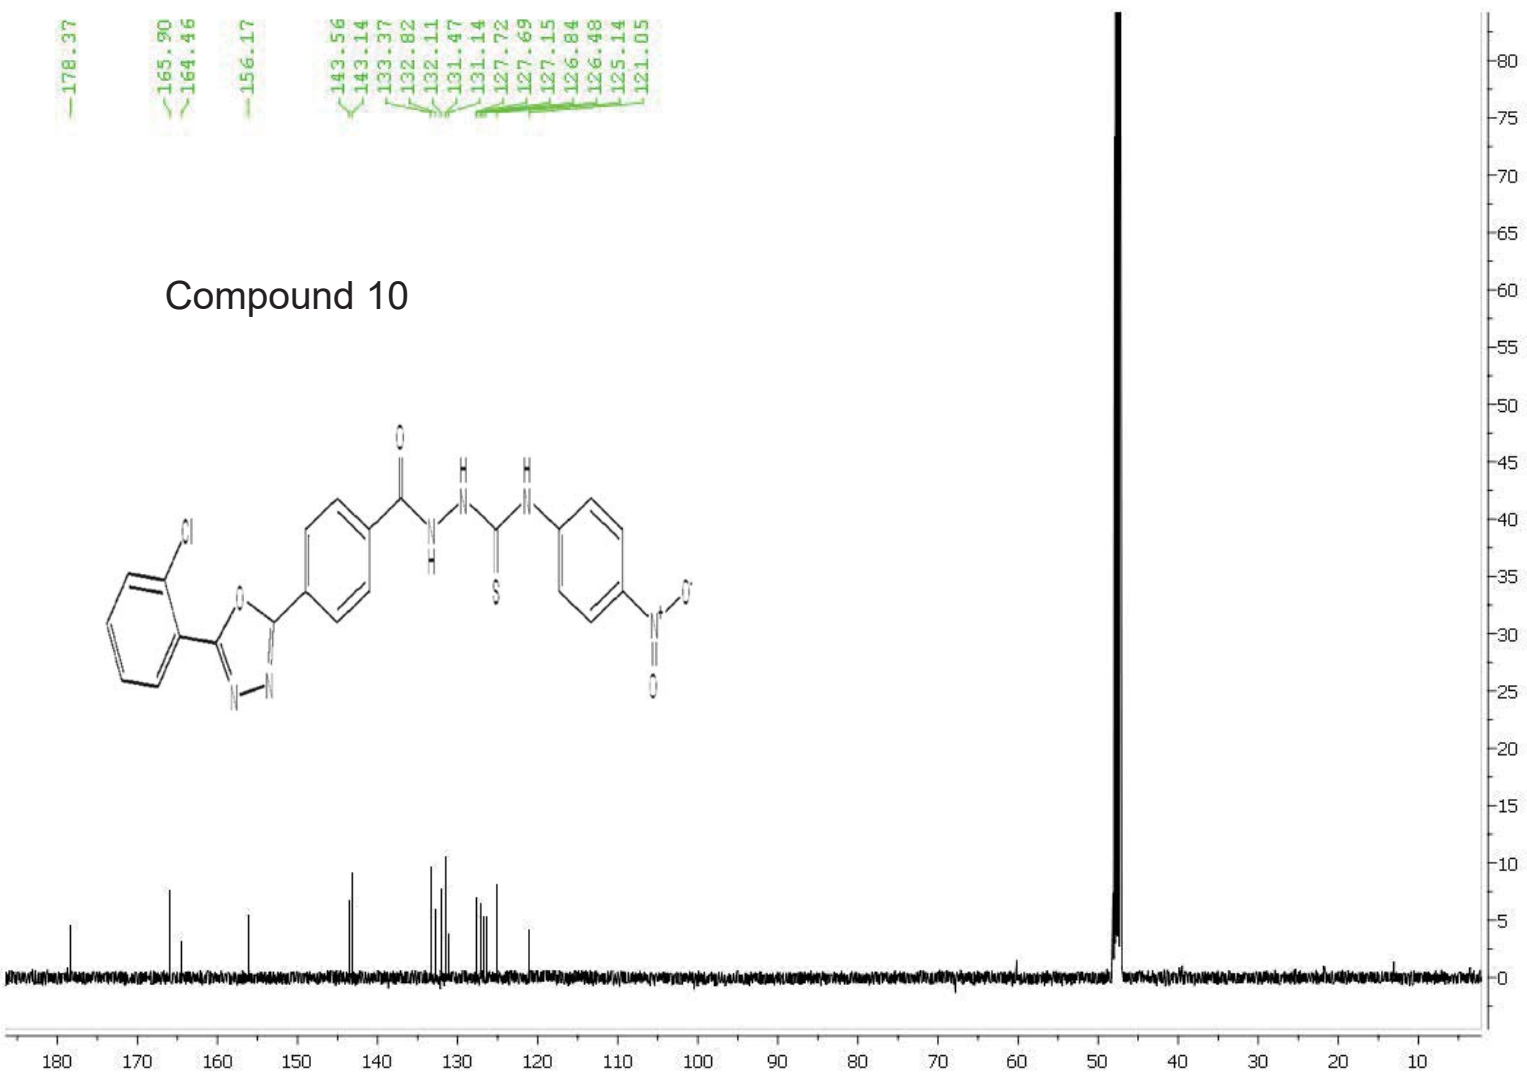

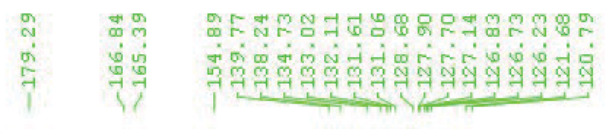

Compound 11

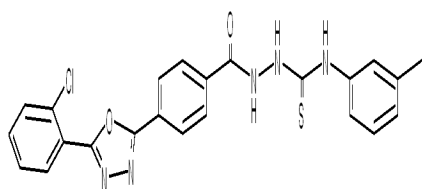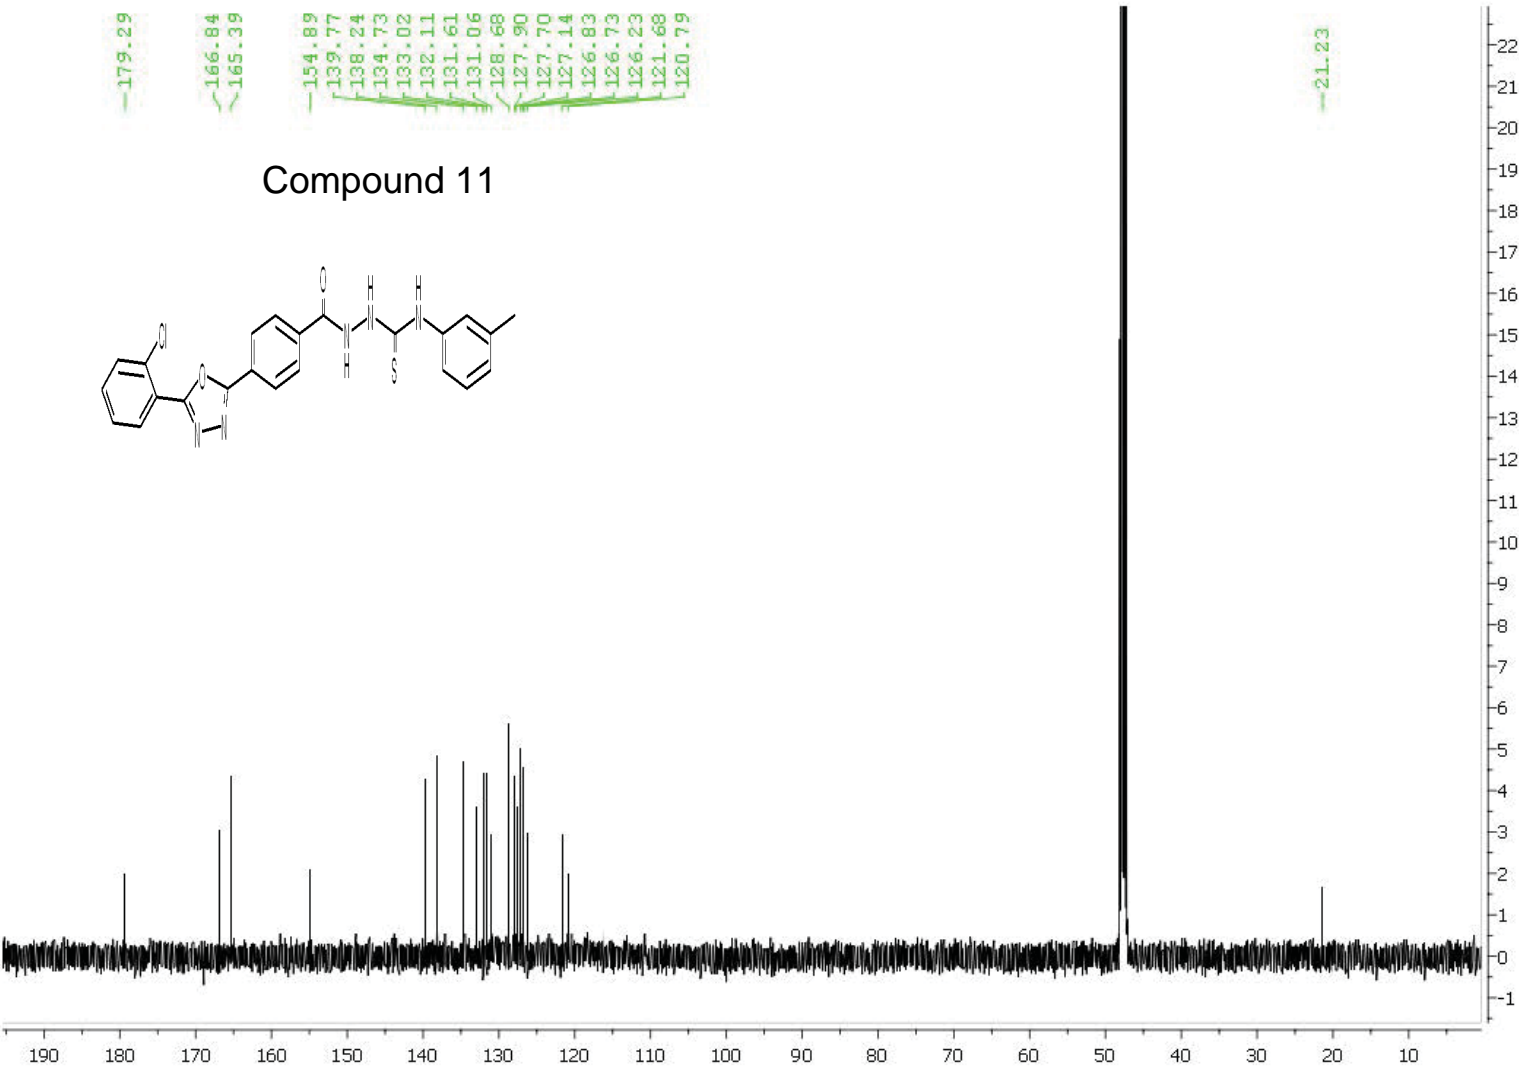

# Compound 12

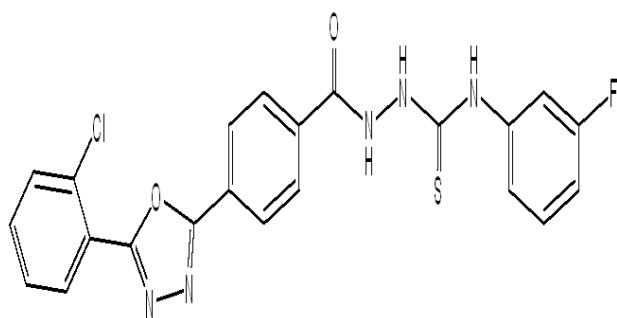

179.35  
166.86  
165.33  
160.45  
160.06  
155.14  
140.26  
134.47  
132.95  
132.32  
131.54  
129.40  
127.90  
127.66  
126.71  
118.52  
112.37  
111.51

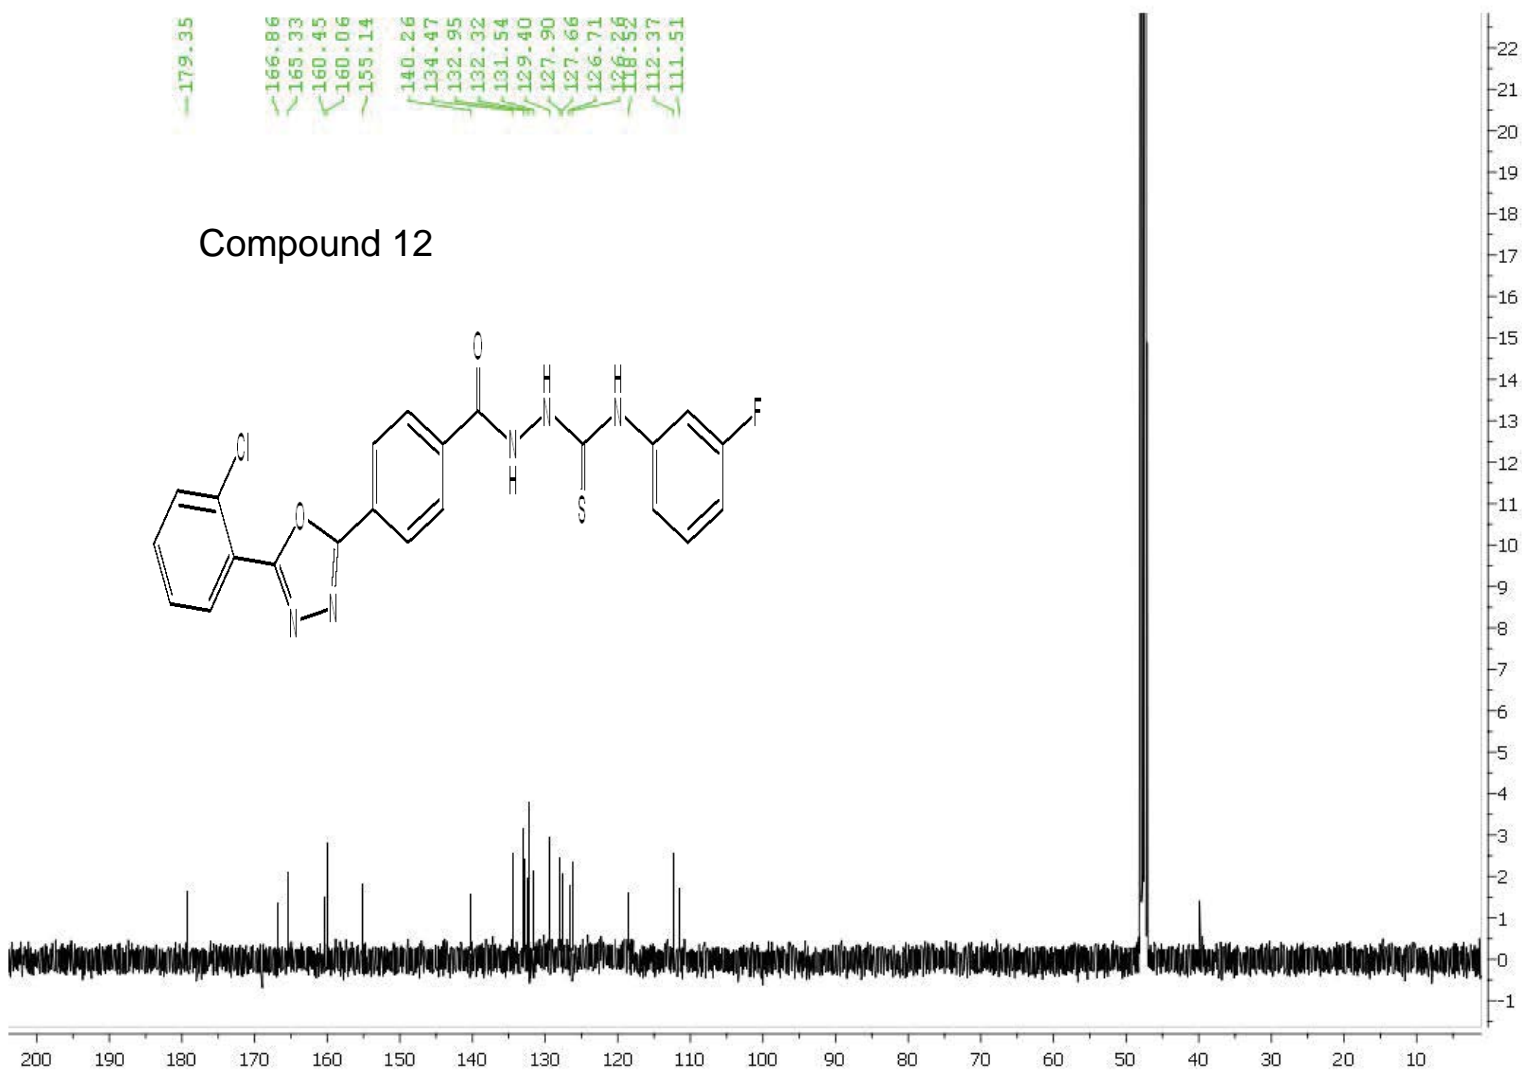

179.48  
166.99  
165.36  
155.31  
140.96  
134.41  
133.07  
132.32  
131.48  
131.28  
129.65  
127.73  
127.64  
127.16  
126.82  
126.38  
125.66  
122.82  
122.07  
120.68

### Compound 13

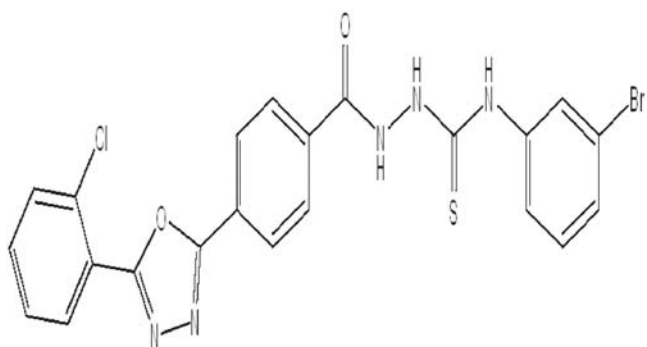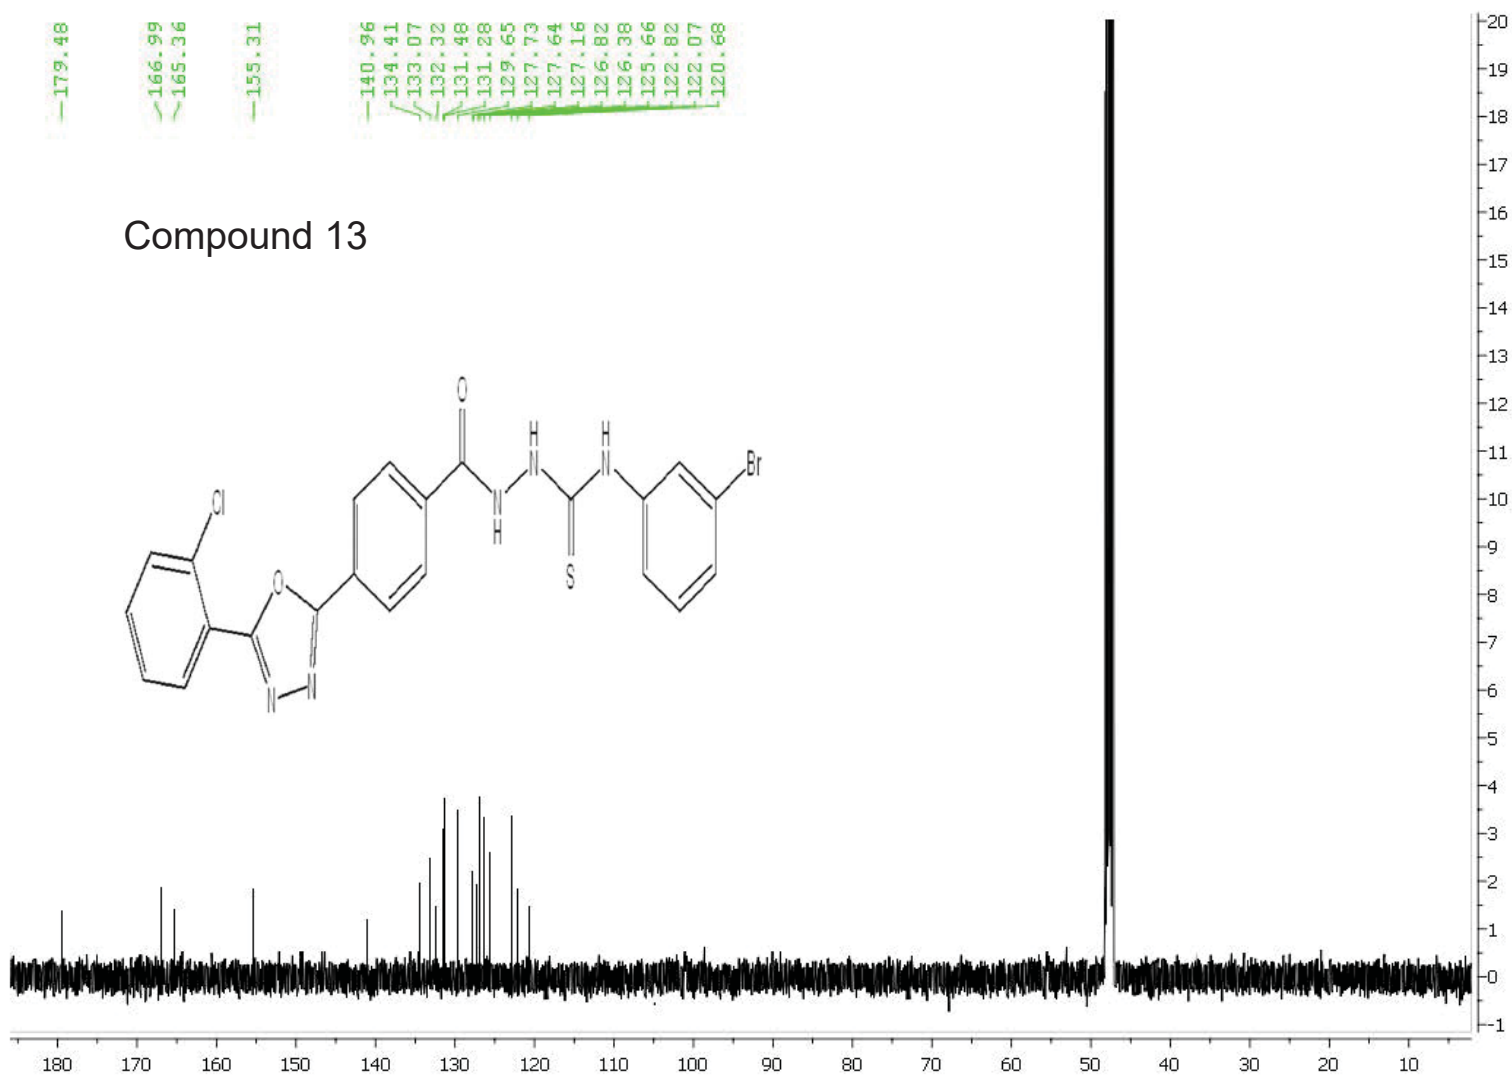

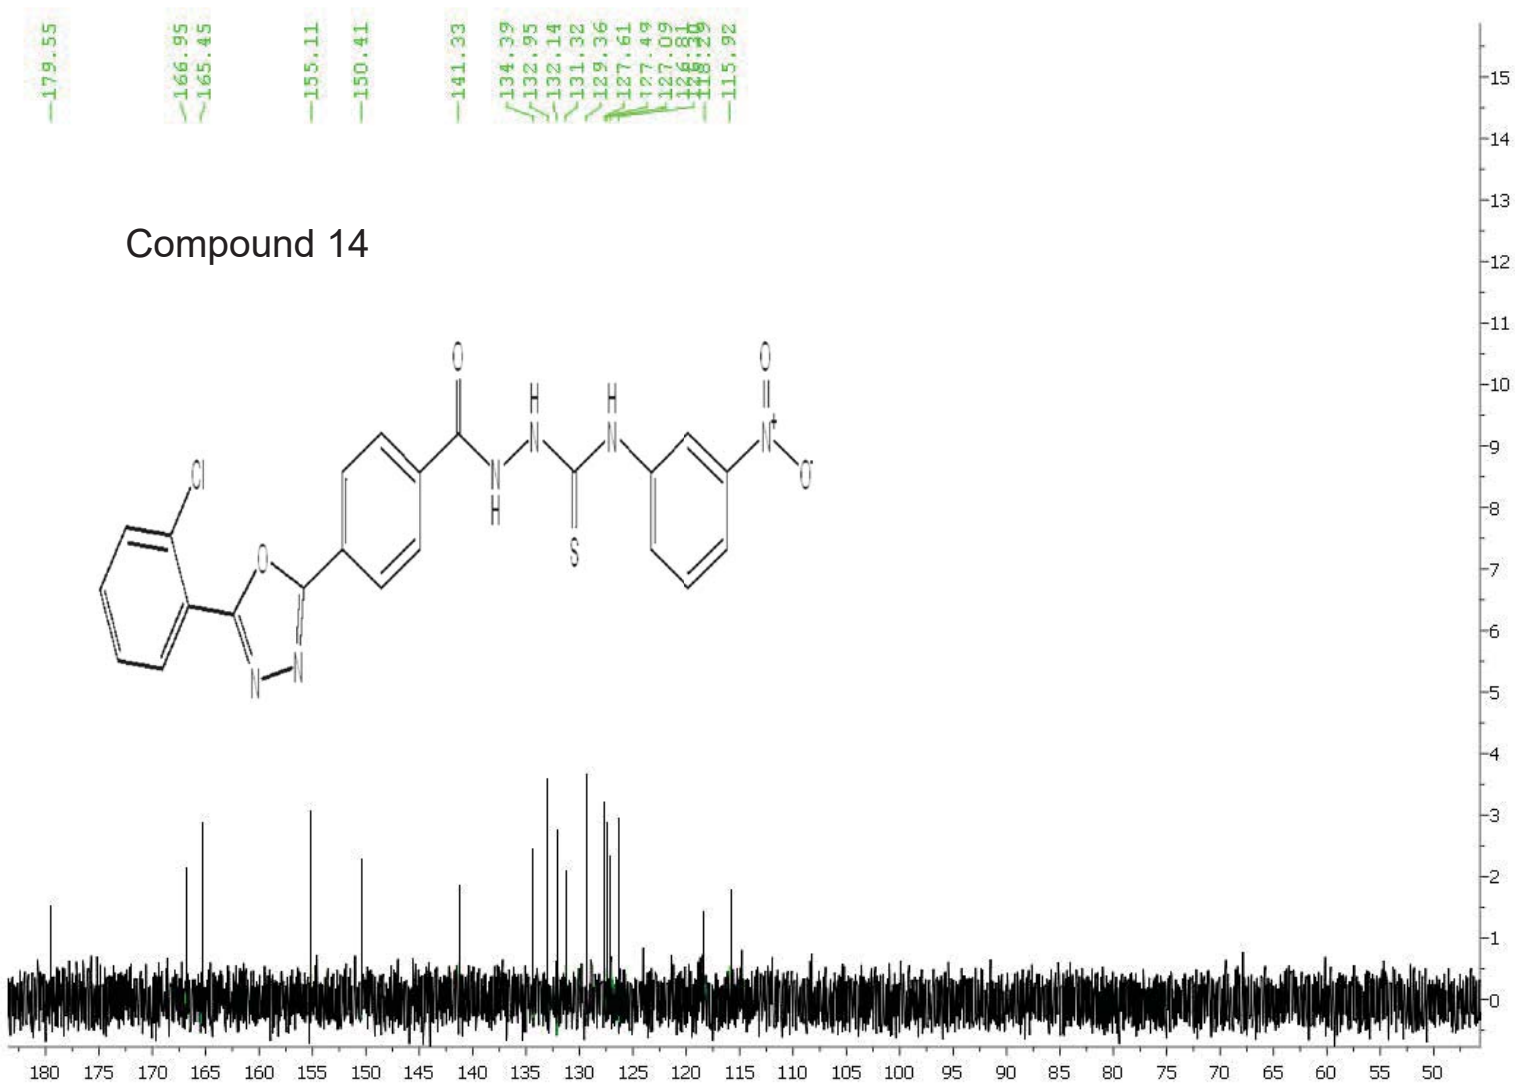

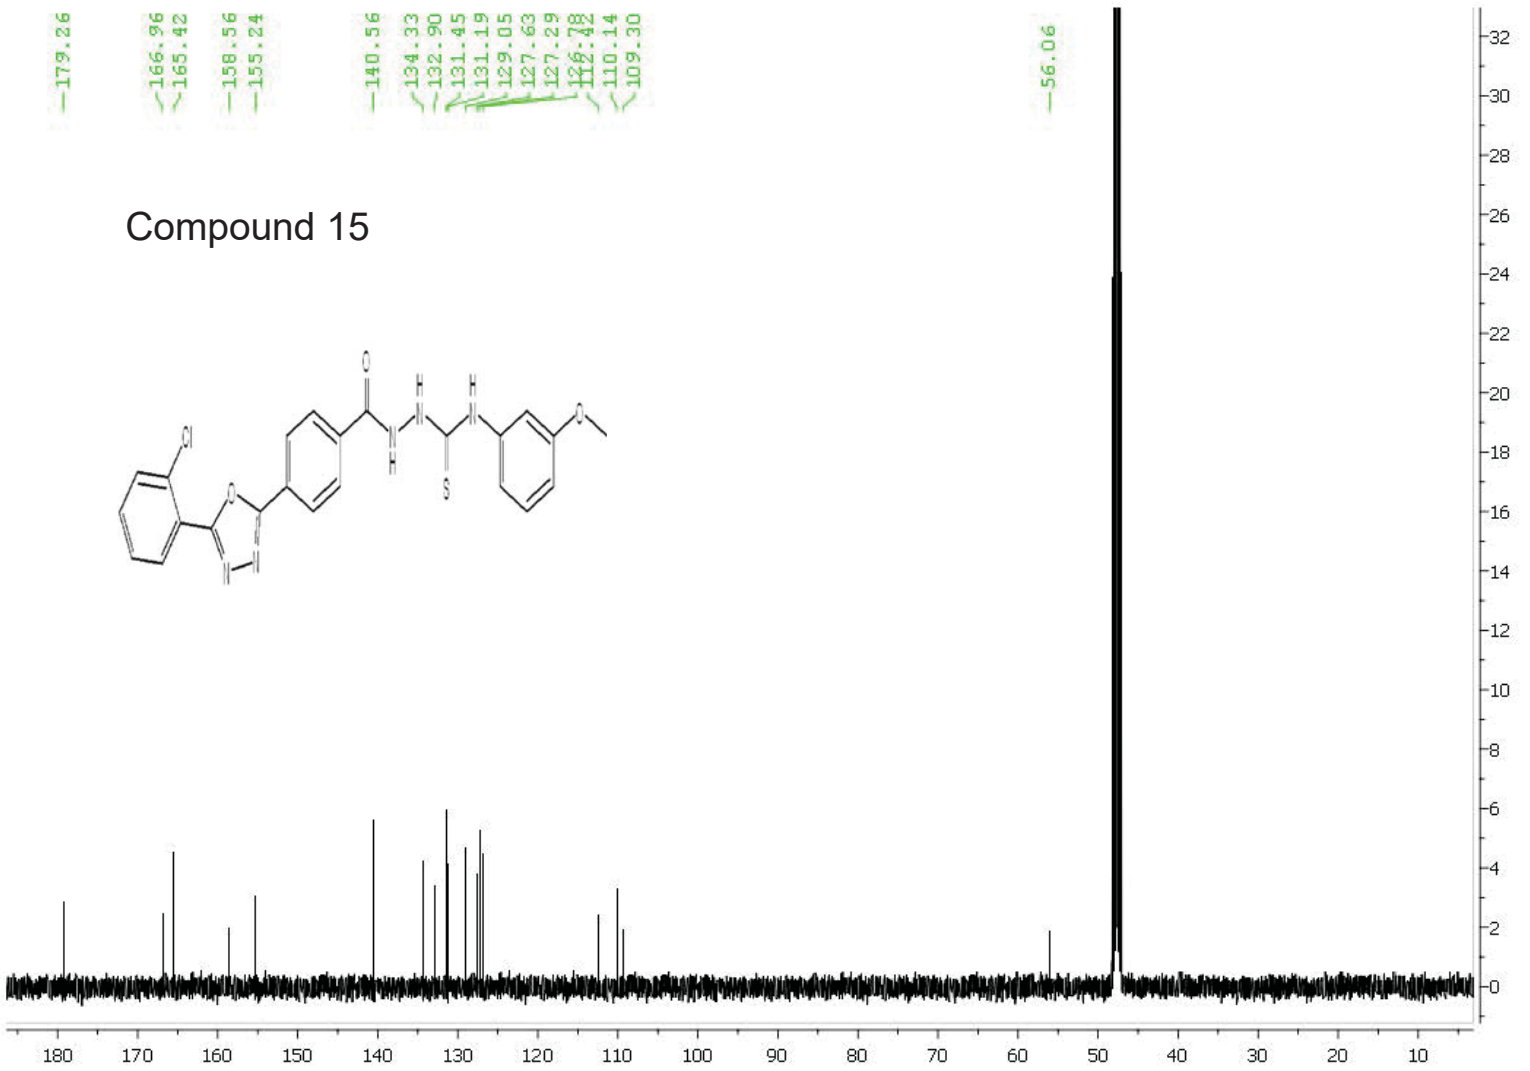

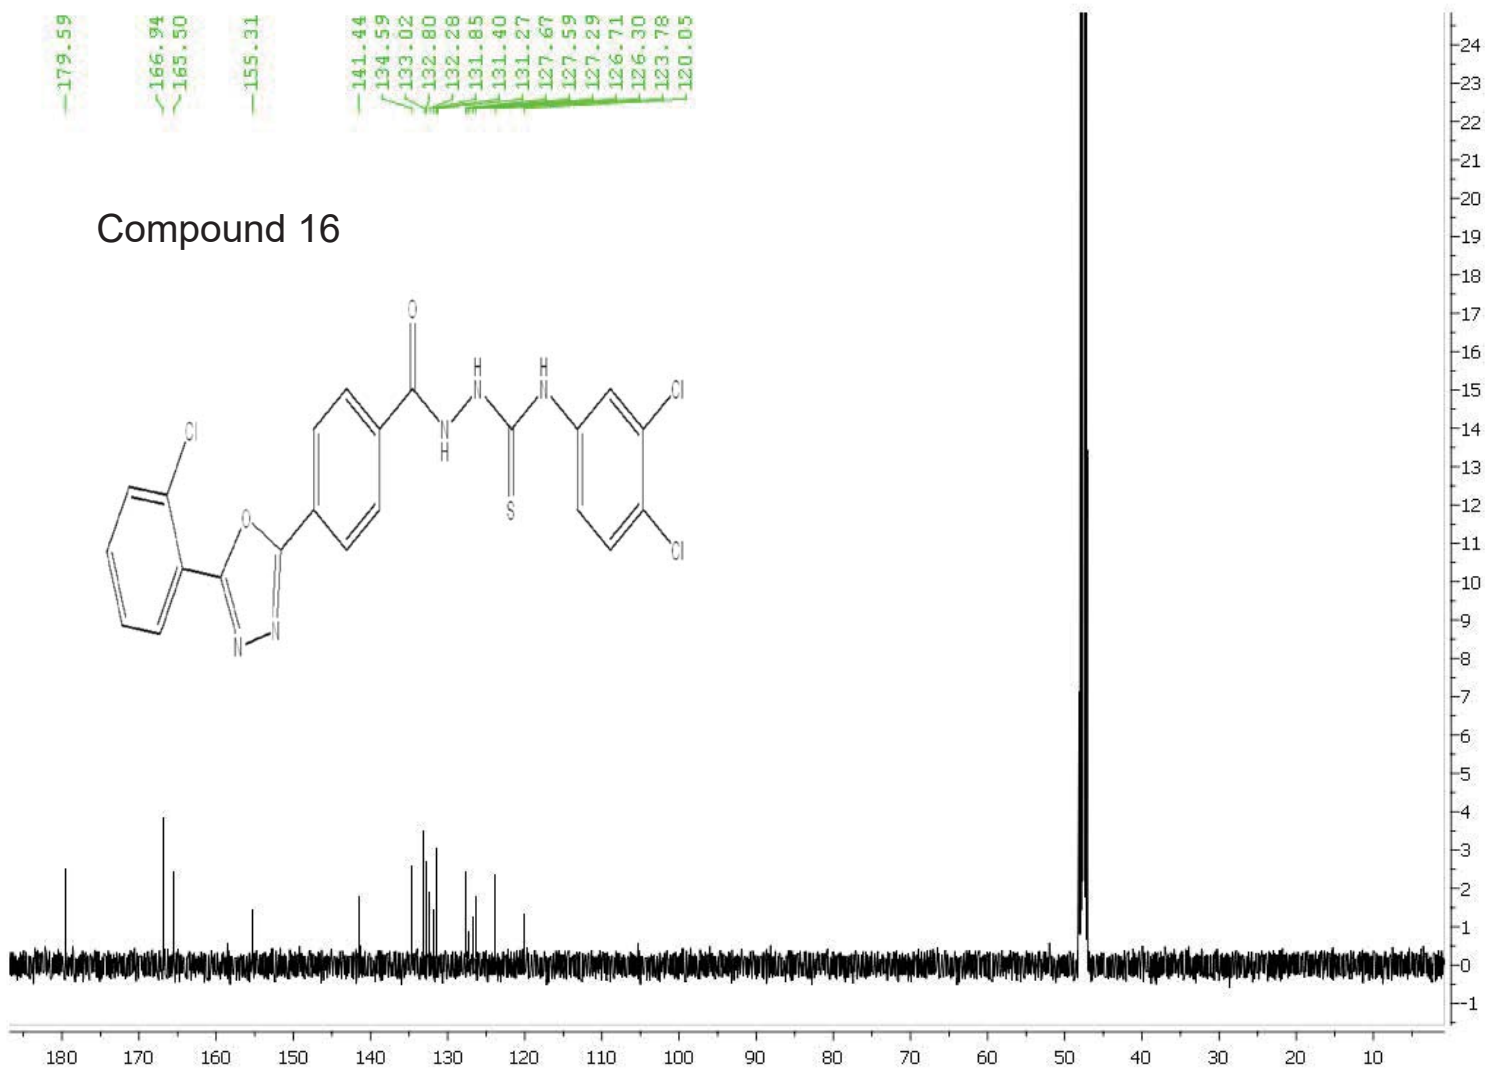



180.17  
167.04  
165.38  
155.22  
142.22  
135.36  
133.90  
132.22  
131.34  
127.70  
127.60  
127.23  
126.72  
126.48  
126.03  
124.84  
124.46  
121.38  
120.57

Compound 17

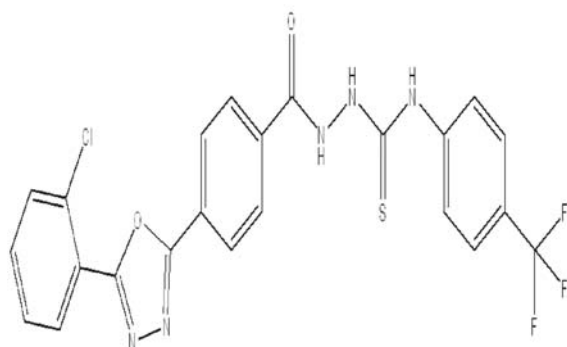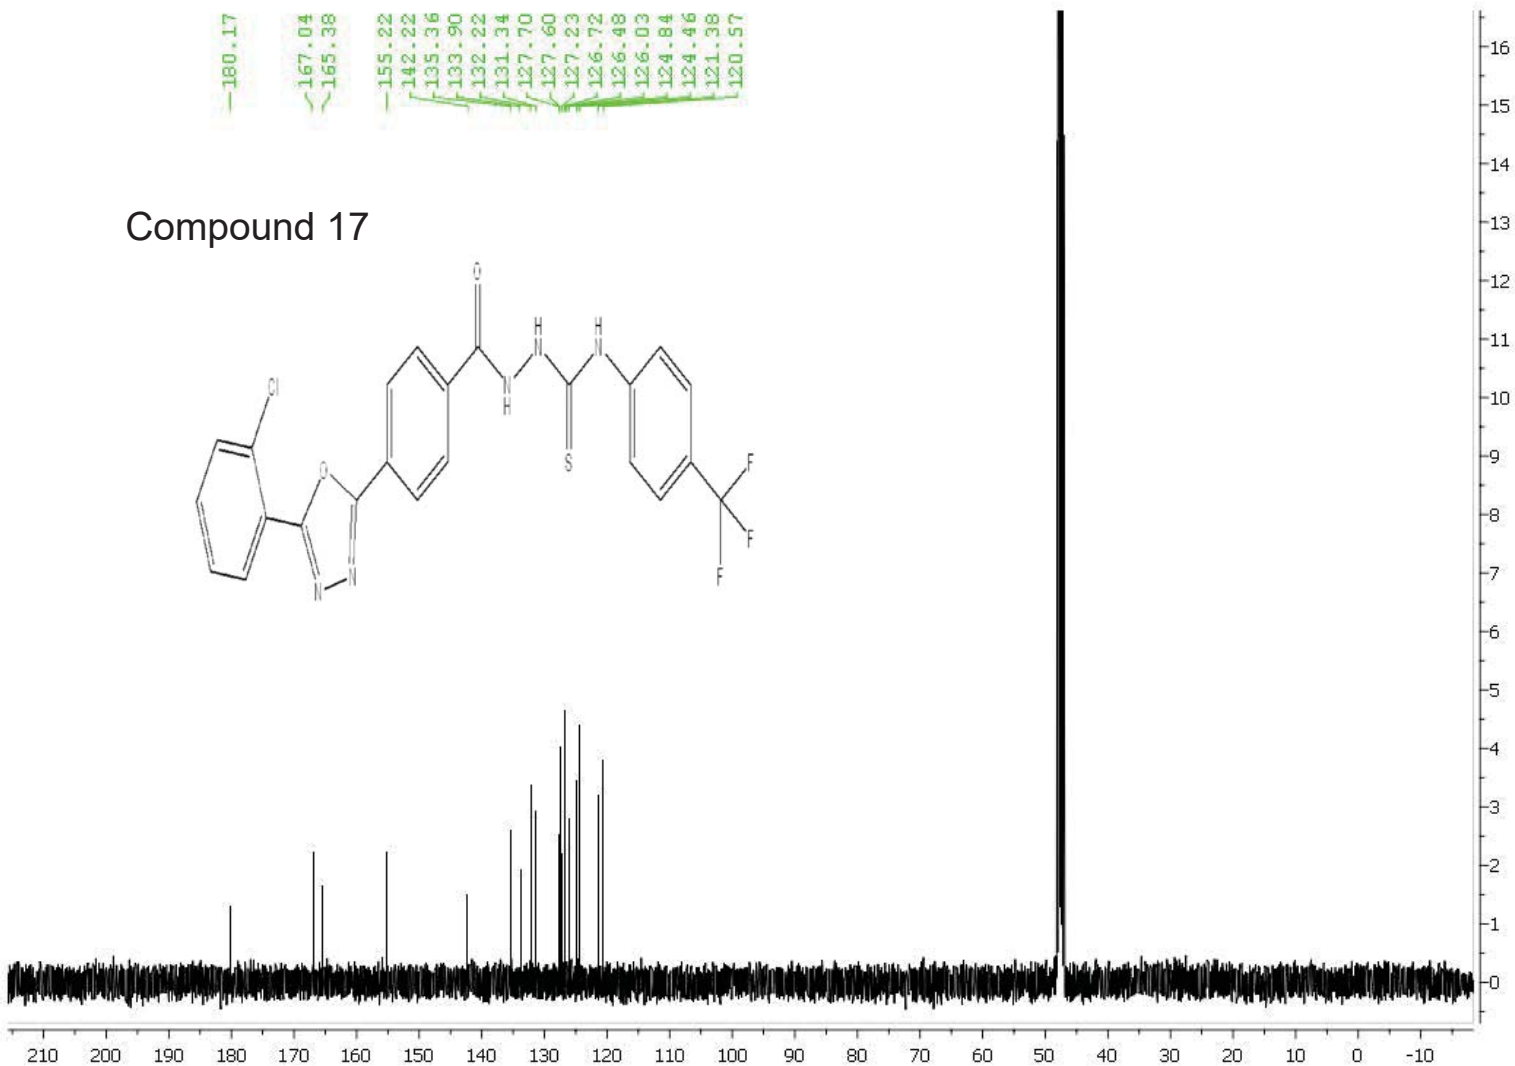

179.51  
166.90  
165.58  
158.42  
154.86  
140.21  
134.43  
133.05  
132.13  
131.24  
131.17  
128.95  
127.73  
127.61  
127.15  
126.75  
126.38  
112.55  
110.15  
109.13  
56.41

### Compound 18

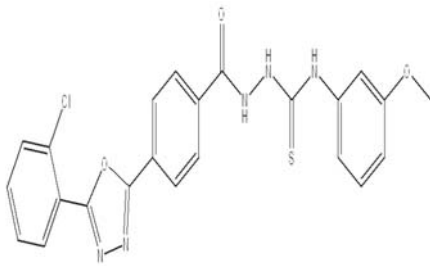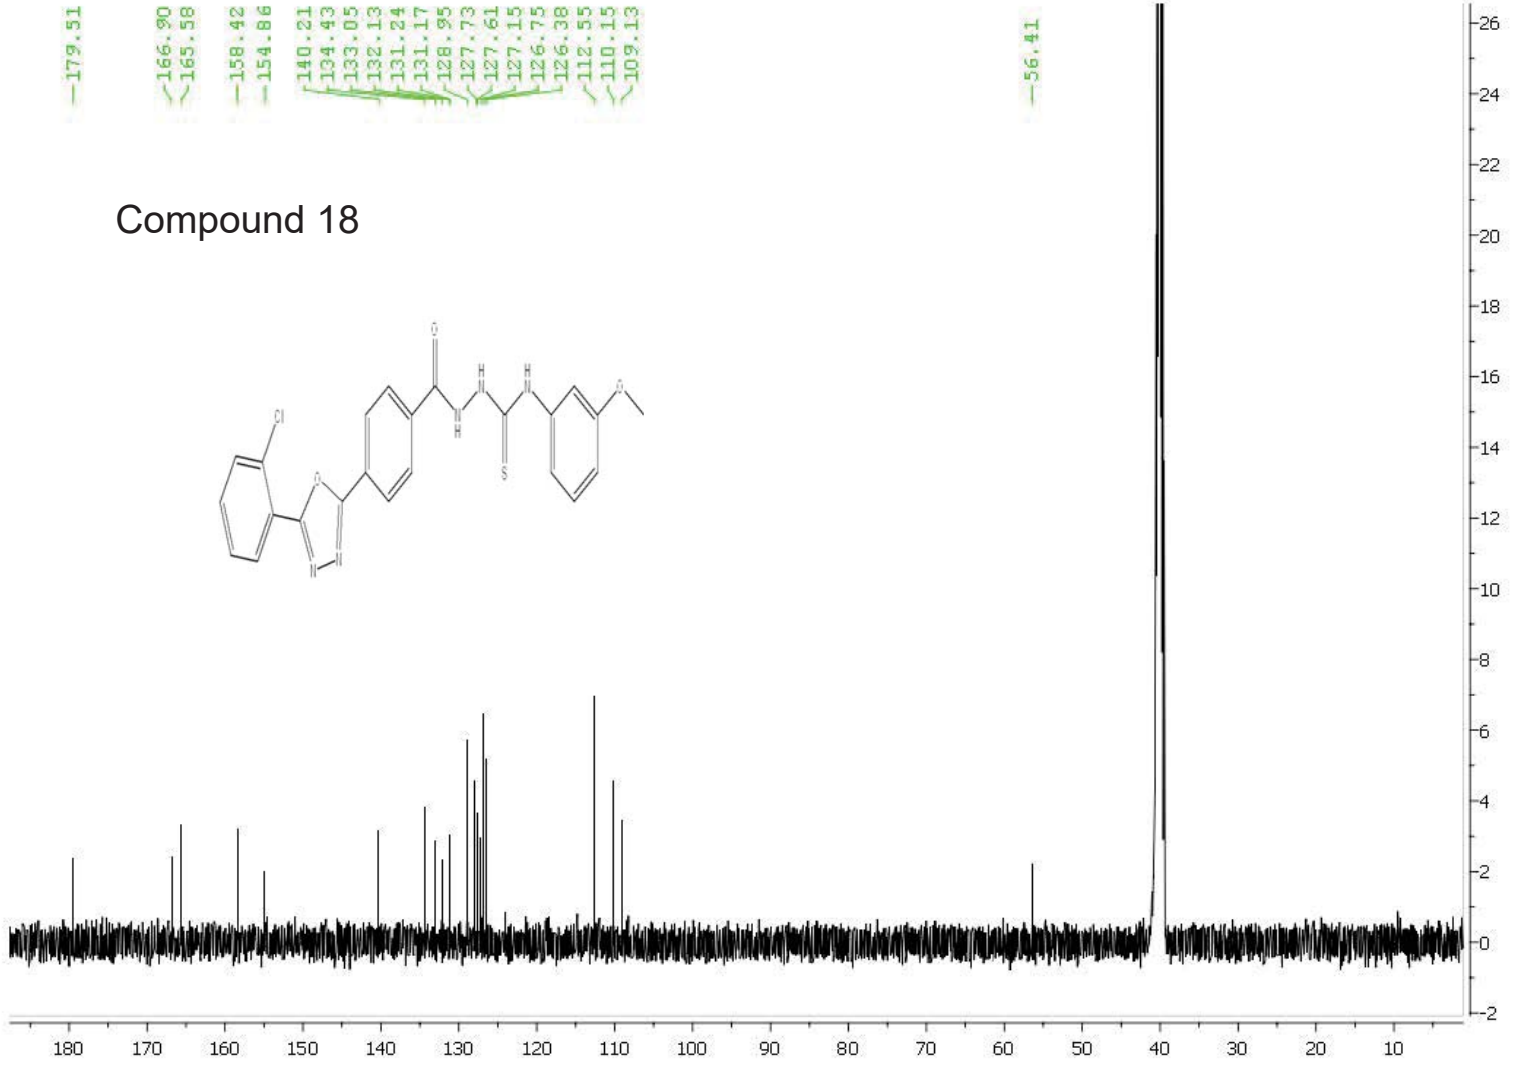

Supplement: c5ra28012e1.pdf [file c5ra28012e1.pdf]
